# Supplementary material
Source: Springer Nature journal article supplement (https://www.springermedizin.de/resource/supplementary/12986_2008_180_MOESM3_ESM.pdf/25655534)

control

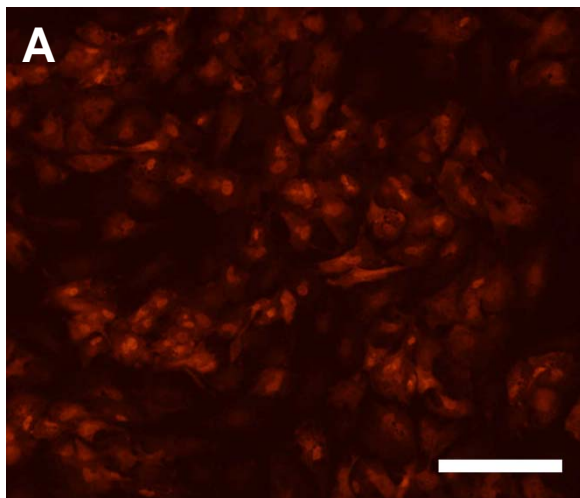

0.5% White Tea extract solution

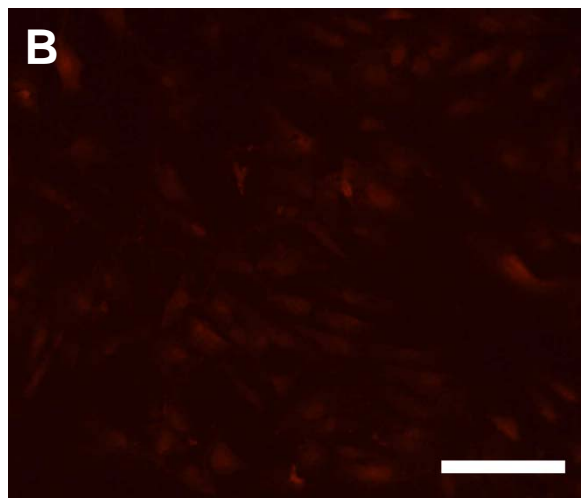

**C** ADD1/SREBP-1c expression

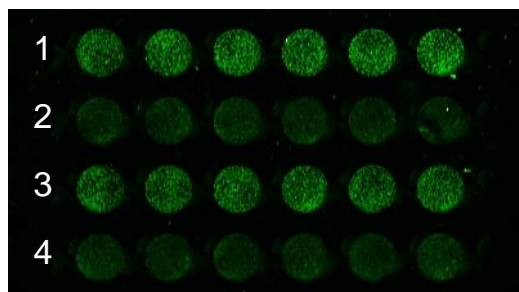

**D** GAPDH expression

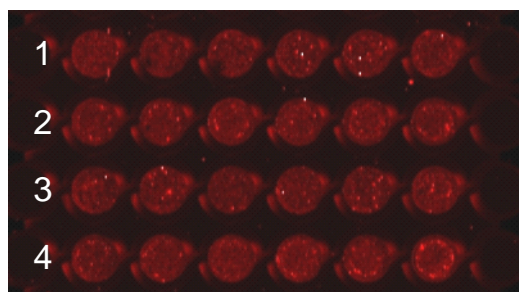

**E**

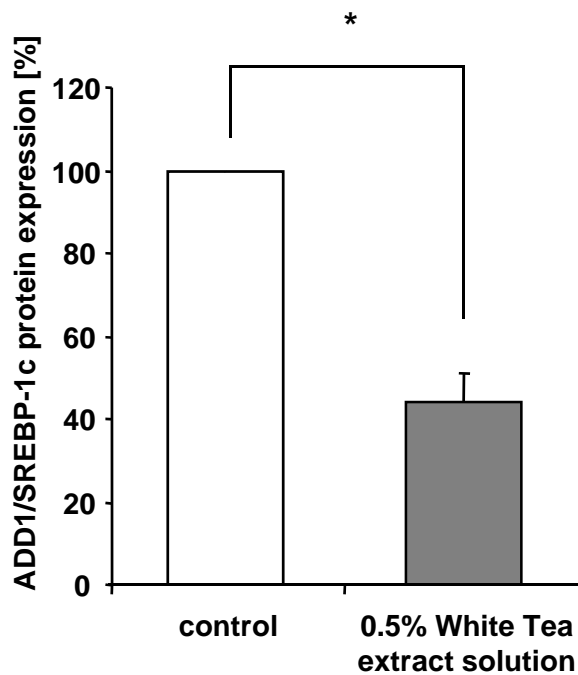

Supplement: MOESM3 [file 25655534]
